# Supplementary material for: Seismological and Hydrogeological Controls on New Zealand-Wide Groundwater Level Changes Induced by the 2016 Mw7.8 Kaikōura Earthquake
Source: Hindawi journal article supplement (doi:10.1155/2019/9809458), 2019-06-27
Supplement: f1 [file 9809458.f1.zip]

Archive with 2 entries (2 files):
- Supplementary_Data_accepted_Weaver_et_al.xlsx
- Supplementary_Material_accepted_Weaver_et_al.pdf
