# Supplementary material for: Seismological and Hydrogeological Controls on New Zealand-Wide Groundwater Level Changes Induced by the 2016 Mw7.8 Kaikōura Earthquake
Source: Hindawi journal article supplement (doi:10.1155/2019/9809458), 2019-06-27
Supplement: f1 [file 9809458.f1.zip › Supplementary_Data_accepted_Weaver_et_al.xlsx]

## Sheet: Excel2LaTeX
RangeAddress	Options	CellWidth	Indent	FileName
3610	7	5	0	I:\Work\PhD\Latek\PhD Thesis\Appendices\Kaikoura\Kaikoura_appendix3.tex

## Sheet: supplementary_data
2	3		6	7	8	9	10	11	12	13	14	15
Regional council well number	Council	NZTM	Depth (m)	VS30 (m/s)	EpiDist (km)	PGA (m/s/s)	PGV (m/s)	Sigma_kk (kPa)	Jump (mm)	Offset (mm)	Total time (min)	Change
N1	Northland	6044135,1716509	62	892	779	0.011	0.003	-0.383	-224	-164	17	Decrease
N2	Northland	6001435,1696014	NaN	210	734	0.034	0.011	-0.448	NaN	NaN	NaN	None
N3	Northland	6004481,1742848	82	255	744	0.012	0.004	-0.479	NaN	NaN	NaN	None
N4	Northland	6003876,1742730	60	255	744	0.012	0.004	-0.48	NaN	NaN	NaN	None
N5	Northland	6045032,1702168	34	955	778	0.022	0.007	-0.372	17	14	20	Increase
N6	Northland	6097232,1702052	45	976	830	0.045	0.015	-0.297	NaN	NaN	NaN	None
N7	Northland	6127360,1642406	NaN	212	855	0.049	0.002	-0.227	NaN	NaN	NaN	None
N8	Northland	6003002,1736782	52	949	742	0.012	0.004	-0.478	6	0	110	No change
N9	Northland	6127793,1646726	40	163	855	0.047	0.002	-0.23	-15	0	20	No change
336996	Horizons	5530764,1826761	87	187	342	0.816	0.182	-8.172	2369	2369	12990	Increase
336995	Horizons	5530764,1826761	66	187	342	0.816	0.182	-8.172	1561	1561	10230	Increase
336994	Horizons	5530764,1826761	51	187	342	0.816	0.182	-8.172	1561	1561	10230	Increase
336993	Horizons	5530764,1826761	33	187	342	0.816	0.182	-8.172	1160	1160	13230	Increase
336992	Horizons	5530764,1826761	18	187	342	0.816	0.182	-8.172	-257	338	8865	Increase
336991	Horizons	5530764,1826761	12	187	342	0.816	0.182	-8.172	NaN	NaN	NaN	None
322029	Horizons	5538523,1789840	42	210	325	1.056	0.236	-13.024	20	20	15	Increase
362999	Horizons	5496743,1790555	17	291	292	0.73	0.128	-18.192	-116	-116	15	Decrease
342071	Horizons	5517511,1789984	65	203	308	1.263	0.276	-15.683	30	30	30	Increase
342105	Horizons	5517328,1789981	205	203	308	1.263	0.276	-15.708	938	0	30	No change
342105	Horizons	5517328,1789981	205	203	308	1.263	0.276	-15.708	938	0	30	No change
342105	Horizons	5517328,1789981	205	203	308	1.263	0.276	-15.708	938	0	30	No change
312028	Horizons	5557110,1787923	16	210	339	0.802	0.18	-11.139	1313	32	60	Increase
362035	Horizons	5495489,1787132	13	210	289	0.857	0.148	-19.59	4	0	90	No change
332018	Horizons	5528529,1790291	161	210	317	1.195	0.263	-14.185	NaN	NaN	NaN	None
332003	Horizons	5528510,1790296	63	210	317	1.195	0.263	-14.187	NaN	NaN	NaN	None
327003	Horizons	5537306,1834867	51	330	352	0.706	0.157	-7.033	233	233	870	Increase
332051	Horizons	5526790,1792642	97	210	317	1.214	0.264	-13.952	-267	-577	645	Decrease
352261	Horizons	5507132,1790807	18	210	301	0.925	0.198	-16.828	-18	0	120	No change
GPG059	Gisborne	5719887,2028643	23	214	618	0.211	0.088	-0.665	NaN	NaN	NaN	None
GPG060	Gisborne	5719887,2028634	78	214	618	0.211	0.088	-0.665	-70	-70	30	Decrease
GPG088	Gisborne	5719891,2028370	170	214	617	0.211	0.088	-0.666	-70	-70	30	Decrease
GPB099	Gisborne	5711059,2033687	7	210	615	0.173	0.064	-0.636	NaN	NaN	NaN	None
GPB101	Gisborne	5711057,2033687	60	210	615	0.173	0.064	-0.636	-40	-40	45	Decrease
GPB102	Gisborne	5710963,2033720	99	210	615	0.173	0.064	-0.636	-91	-91	30	Decrease
GPE032	Gisborne	5716011,2028175	12	210	615	0.258	0.102	-0.668	NaN	NaN	NaN	None
GPE041	Gisborne	5716015,2028171	55	210	615	0.258	0.102	-0.668	-20	0	4650	No change
GPB103	Gisborne	5711510,2032988	146	210	615	0.199	0.08	-0.64	-114	-60	420	Decrease
N32/0490	Golders	5271892,1588779	9	210	13	7.897	0.567	-481.376	22	22	15	Increase
N32/0497	Golders	5272159,1588638	6	210	13	7.885	0.567	-490.289	203	27	1830	Increase
N32/0494	Golders	5272162,1588638	6	210	13	7.885	0.567	-490.418	1567	18	1455	Increase
N32/0493	Golders	5279225,1601805	6	210	6	11.76	0.874	-18757.7	1428	17	1455	Increase
N32/0502	Golders	5277537,1602924	9	216	4	11.1	0.805	-5097.71	109	92	45	Increase
N32/0503	Golders	5277621,1603272	64	216	4	11.1	0.851	-4860.9	2860	795	69120	Increase
N32/0495	Golders	5277565,1603085	55	216	4	11.1	0.805	-4981.46	1408	573	75600	Increase
N32/0495	Golders	5277565,1603085	55	216	4	11.1	0.805	-4981.46	1694	1694	1440	Increase
D43/0049	Southland	4949999,1192803	15	235	521	0.105	0.035	-0.265	21	0	60	No change
E44/0183	Southland	4937066,1238860	52	270	495	0.03	0.011	-0.401	NaN	NaN	NaN	None
E44/0196	Southland	4929647,1234800	34	220	503	0.028	0.011	-0.39	4	-4	660	Decrease
E44/0198	Southland	4929651,1234801	7	220	503	0.028	0.011	-0.39	NaN	NaN	NaN	None
E44/0223	Southland	4919016,1244864	16	566	503	0.024	0.01	-0.422	NaN	NaN	NaN	None
E44/0232	Southland	4932747,1240206	10	210	497	0.029	0.011	-0.406	NaN	NaN	NaN	None
E44/0254	Southland	4932310,1240931	NaN	210	497	0.029	0.011	-0.408	NaN	NaN	NaN	None
E44/0300	Southland	4929667,1242227	53	210	497	0.028	0.011	-0.413	34	-2	110	Decrease
E44/0386	Southland	4910951,1254633	19	330	502	0.022	0.009	-0.45	NaN	NaN	NaN	None
E45/0330	Southland	4887993,1226627	15	270	538	0.018	0.008	-0.369	NaN	NaN	NaN	None
F43/0021	Southland	4952827,1261410	14	688	468	0.035	0.009	-0.475	9	0	70	No change
F44/0087	Southland	4915560,1273799	13	311	485	0.023	0.008	-0.514	NaN	NaN	NaN	None
F44/0181	Southland	4908538,1269730	6	270	493	0.021	0.008	-0.497	9	10	76	Increase
F44/0214	Southland	4912537,1271391	9	270	489	0.022	0.008	-0.504	NaN	NaN	NaN	None
F44/0301	Southland	4920223,1267748	54	330	486	0.025	0.009	-0.495	NaN	NaN	NaN	None
F44/0368	Southland	4918051,1265419	9	276	489	0.024	0.009	-0.487	NaN	NaN	NaN	None
F45/0569	Southland	4897097,1281481	5	225	494	0.019	0.008	-0.527	NaN	NaN	NaN	None
F45/0612	Southland	4899826,1275376	10	270	496	0.02	0.008	-0.51	-2	-2	30	Decrease
F46/0192	Southland	4854734,1274170	15	223	532	0.013	0.006	-0.469	NaN	NaN	NaN	None
F46/0250	Southland	4865692,1274842	18	210	523	0.015	0.006	-0.481	NaN	NaN	NaN	None
461	Bay of Plenty	5795207,1937529	13	165	620	0.059	0.019	-0.997	NaN	NaN	NaN	None
951	Bay of Plenty	5809725,1900713	114	270	614	0.032	0.009	-1.093	-10	-1	120	Decrease
2060	Bay of Plenty	5782699,1936243	61	241	609	0.088	0.032	-1.054	-50	-46	90	Decrease
2328	Bay of Plenty	5835029,1856255	454	578	616	0.112	0.032	-1.102	-104	0	20	No change
2330	Bay of Plenty	5843917,1862534	119	623	627	0.098	0.027	-1.036	3	0	20	No change
2504	Bay of Plenty	5826984,1876959	213	293	618	0.074	0.021	-1.088	77	0	70	No change
2541	Bay of Plenty	5789513,1928994	199	197	611	0.064	0.024	-1.062	309	0	25	No change
2822	Bay of Plenty	5806638,1906056	122	376	614	0.033	0.009	-1.087	-47	0	35	No change
10800	Bay of Plenty	5804869,1901707	370	941	610	0.03	0.009	-1.114	-34	-28	30	Decrease
100106	Bay of Plenty	5821070,1893287	26	84	620	0.034	0.009	-1.064	NaN	NaN	NaN	None
100107	Bay of Plenty	5821070,1893287	46	84	620	0.034	0.009	-1.064	NaN	NaN	NaN	None
1001058	Bay of Plenty	5821070,1893287	76	84	620	0.034	0.009	-1.064	NaN	NaN	NaN	None
1000147	Bay of Plenty	5813327,1902049	10	227	618	0.034	0.009	-1.07	-2	0	70	No change
1001059	Bay of Plenty	5807049,1916652	128	93	620	0.038	0.011	-1.04	-80	0	75	No change
1001238	Bay of Plenty	5683178,1894711	119	844	504	0.319	0.032	-2.041	-166	143	415	Increase
1001239	Bay of Plenty	5683178,1894711	9	844	504	0.319	0.032	-2.041	4	0	10	No change
1001241	Bay of Plenty	5691302,1891883	24	1000	509	0.177	0.028	-2.006	-15	-7	140	Decrease
1001247	Bay of Plenty	5697494,1902845	90	998	520	0.145	0.027	-1.814	38	38	30	Increase
1001249	Bay of Plenty	5698350,1894957	101	1000	516	0.117	0.026	-1.904	-368	0	120	No change
1001283	Bay of Plenty	5815238,1892123	150	235	615	0.031	0.008	-1.098	-5	0	180	No change
1001284	Bay of Plenty	5815238,1892123	15	235	615	0.031	0.008	-1.098	7	7	75	Increase
1001287	Bay of Plenty	5815238,1892123	48	235	615	0.031	0.008	-1.098	23	12	40	Increase
23547	Tasman	5451074,1598402	20	210	177	0.777	0.092	33.296	-64	-64	90	Decrease
14	Tasman	5428138,1615029	54	50	155	1.231	0.126	60.617	NaN	NaN	NaN	None
4616	Tasman	5411731,1585760	12	297	139	0.849	0.115	117.495	NaN	NaN	NaN	None
98	Tasman	5426075,1609506	8	211	153	1.019	0.112	73.971	-15	-15	15	Decrease
23663	Tasman	5439661,1598295	400	715	166	0.79	0.1	50.57	-631	-631	15	Decrease
23579	Tasman	5422210,1611013	20	267	149	1.095	0.118	84.741	-352	0	207	No change
1129	Tasman	5419264,1606681	10	461	146	1.006	0.112	99.039	10	10	15	Increase
23548	Tasman	5449008,1601369	20	210	175	0.729	0.089	34.073	NaN	NaN	NaN	None
375	Tasman	5421646,1608077	NaN	210	148	1.02	0.113	89.571	NaN	NaN	NaN	None
4617	Tasman	5415804,1585944	13	284	143	0.858	0.117	105.804	-24	2	165	Increase
20992	Tasman	5448011,1599123	20	215	174	0.703	0.089	36.889	-9	0	30	No change
1069	Tasman	5427527,1610406	7	210	154	1.042	0.112	68.726	-8	-2	60	Decrease
2179	Tasman	5449644,1599953	21	210	176	0.724	0.089	34.173	16	9	45	Increase
2181	Tasman	5449561,1599932	10	210	176	0.724	0.089	34.295	-3	3	30	Increase
8435	Tasman	5442942,1598227	172	210	169	0.746	0.097	45.005	-199	-90	4800	Decrease
6013	Tasman	5478079,1580464	20	857	206	1.345	0.117	17.663	-172	-31	360	Decrease
105	Tasman	5419844,1609865	38	211	146	1.063	0.115	94.417	-559	0	4410	No change
8108	Tasman	5427717,1606551	501	283	154	0.964	0.11	72.008	-753	-753	30	Decrease
2164	Tasman	5450272,1599868	19	210	177	0.757	0.091	33.413	-41	0	60	No change
2607	Tasman	5451703,1599778	37	210	178	0.79	0.093	31.676	-17	-17	15	Decrease
2601	Tasman	5448779,1599607	62	215	175	0.703	0.09	35.542	-2	6	75	Increase
8107	Tasman	5431333,1600891	501	679	158	0.882	0.107	66.462	-696	-316	4365	Decrease
6912	Tasman	5465031,1585228	64	264	192	1.018	0.102	24.962	-176	-113	45	Decrease
2628	Tasman	5450129,1601516	21	198	177	0.76	0.089	32.498	18	0	30	No change
8109	Tasman	5430426,1606108	510	623	157	0.943	0.108	65.175	-895	-895	15	Decrease
23648	Tasman	5476632,1583769	37	209	204	1.505	0.125	17.564	-10	10	75	Increase
6339	Tasman	5476979,1583724	20	210	204	1.571	0.125	17.38	13	6	75	Increase
2166	Tasman	5447839,1601246	21	271	174	0.698	0.087	35.754	11	0	120	No change
8110	Tasman	5440563,1602174	506	994	167	0.789	0.097	46.586	-570	-570	15	Decrease
2603	Tasman	5449168,1597694	29	700	176	0.727	0.091	36.158	16	0	60	No change
23367	Tasman	5424633,1609836	8	210	151	1.052	0.113	78.051	NaN	NaN	NaN	None
119	Tasman	5425524,1614226	44	165	152	1.215	0.125	69.576	1014	0	120	No change
255	Tasman	5429498,1616277	59	170	157	1.26	0.124	54.834	267	267	15	Increase
2614	Tasman	5446323,1600768	7	270	173	0.687	0.089	38.242	NaN	NaN	NaN	None
20864	Tasman	5448595,1602214	8	166	175	0.705	0.088	34.031	NaN	NaN	NaN	None
247	Tasman	5417707,1605872	10	213	144	0.992	0.111	105.289	11	11	60	Increase
2609	Tasman	5446511,1599468	25	270	173	0.705	0.091	38.802	NaN	NaN	NaN	None
21185	Tasman	5453647,1599114	13	210	180	0.848	0.094	29.786	NaN	NaN	NaN	None
2629	Tasman	5452348,1600421	20	208	179	0.823	0.092	30.481	NaN	NaN	NaN	None
22160	Tasman	5427949,1611825	14	155	155	1.114	0.115	65.79	NaN	NaN	NaN	None
1128	Tasman	5419681,1607222	10	224	146	1.006	0.112	97.169	NaN	NaN	NaN	None
23953	Tasman	5429206,1610405	10	38	156	1.035	0.111	64.071	21	0	30	No change
23518	Tasman	5419062,1606407	10	461	146	0.989	0.112	99.941	NaN	NaN	NaN	None
6713	Tasman	5471054,1582206	50	248	198	1.115	0.103	21.447	-20	-20	60	Decrease
BT27_5020	Canterbury	5307180,1651475	10	239	60	3.657	0.512	-782.053	3089	143	123150	Increase
BV24_0023	Canterbury	5256487,1583019	24	270	25	2.766	0.254	-184.038	48	174	1500	Increase
BV24_0024	Canterbury	5256527,1583045	102	270	25	2.766	0.254	-184.51	2320	1159	12600	Increase
BW22_0002	Canterbury	5195286,1527440	102	248	108	0.342	0.044	-15.222	-11	-11	30	Decrease
BW23_0133	Canterbury	5193093,1556033	120	270	93	0.345	0.057	-24.197	187	417	1500	Increase
BW23_0134	Canterbury	5203457,1561298	102	252	81	0.457	0.068	-30.489	157	213	390	Increase
BW24_0037	Canterbury	5201485,1576179	26	212	76	0.871	0.103	-34.667	54	9	105	Increase
BW24_0038	Canterbury	5201460,1576181	69	212	77	0.871	0.103	-34.65	660	639	45	Increase
BW24_0039	Canterbury	5201404,1576180	126	212	77	0.871	0.103	-34.612	240	240	15	Increase
BW24_0210	Canterbury	5209193,1564869	8	299	74	0.589	0.083	-35.396	NaN	NaN	NaN	None
BW24_0260	Canterbury	5220628,1578005	5	270	58	0.996	0.163	-53.366	-5	2	360	Increase
BX23_0044	Canterbury	5158225,1548315	71	221	127	0.254	0.032	-14.068	40	40	30	Increase
BX23_0157	Canterbury	5167987,1555938	84	210	115	0.407	0.038	-17.037	88	52	120	Increase
BY19_0026	Canterbury	5118773,1466420	12	270	206	0.078	0.016	-4.164	10	0	360	No change
BZ19_0148	Canterbury	5092184,1459399	9	270	231	0.075	0.017	-3.472	NaN	NaN	NaN	None
BY21_0183	Canterbury	5129843,1494235	16	270	179	0.12	0.023	-6.138	NaN	NaN	NaN	None
BY21_0197	Canterbury	5126830,1494636	10	270	182	0.121	0.023	-6.057	NaN	NaN	NaN	None
BZ15_5019	Canterbury	5102375,1368500	11	210	289	0.058	0.014	-1.076	NaN	NaN	NaN	None
BZ16_0072	Canterbury	5090987,1376241	17	210	290	0.05	0.013	-1.271	-14	-14	45	Decrease
BZ16_0073	Canterbury	5088676,1386244	11	210	284	0.047	0.013	-1.463	NaN	NaN	NaN	None
BZ18_0013	Canterbury	5116400,1426478	6	259	235	0.133	0.026	-2.435	NaN	NaN	NaN	None
H38_0229	Canterbury	5089482,1365447	10	227	299	0.05	0.013	-1.1	NaN	NaN	NaN	None
H38_0230	Canterbury	5093909,1372015	16	229	292	0.054	0.013	-1.185	7	6	30	Increase
H39_0148	Canterbury	5065250,1349434	60	270	327	0.068	0.02	-0.969	-33	222	1515	Increase
I38_0084	Canterbury	5107699,1390442	12	210	269	0.079	0.017	-1.466	3	3	15	Decrease
I38_0085	Canterbury	5107471,1396545	23	270	264	0.086	0.018	-1.607	NaN	NaN	NaN	None
J37_0013	Canterbury	5121684,1423093	6	270	234	0.122	0.024	-2.299	NaN	NaN	NaN	None
J37_0026	Canterbury	5125649,1427058	5	247	229	0.117	0.022	-2.423	NaN	NaN	NaN	None
J38_0122	Canterbury	5096775,1452347	10	317	231	0.066	0.015	-3.277	-3	-3	45	Decrease
J38_0123	Canterbury	5092113,1459458	10	270	231	0.075	0.017	-3.473	NaN	NaN	NaN	None
J38_0414	Canterbury	5107806,1459016	4	225	219	0.073	0.016	-3.669	NaN	NaN	NaN	None
J38_0465	Canterbury	5106905,1428537	13	378	240	0.113	0.023	-2.509	NaN	NaN	NaN	None
J39_0006	Canterbury	5073670,1455110	10	221	248	0.07	0.017	-3.072	3	0	855	No change
J39_0239	Canterbury	5067651,1449878	5	283	256	0.064	0.016	-2.852	NaN	NaN	NaN	None
J39_0255	Canterbury	5071290,1440646	6	566	259	0.052	0.014	-2.656	NaN	NaN	NaN	None
J39_0511	Canterbury	5072389,1452694	136	195	250	0.068	0.016	-2.987	NaN	NaN	NaN	None
J39_0875	Canterbury	5072759,1456723	143	248	248	0.073	0.017	-3.104	-2	0	60	No change
J40_0071	Canterbury	5040124,1448926	9	312	279	0.064	0.018	-2.491	-4	-4	105	Decrease
J40_1092	Canterbury	5047782,1449995	142	666	272	0.065	0.017	-2.606	14	-2	30	Decrease
K36_0051	Canterbury	5163185,1479850	9	270	164	0.131	0.03	-5.601	NaN	NaN	NaN	None
K36_0439	Canterbury	5159058,1499247	230	270	154	0.159	0.034	-7.666	21	0	30	No change
K36_0493	Canterbury	5159058,1499247	132	270	154	0.159	0.034	-7.666	-644	-713	630	Decrease
K36_0495	Canterbury	5159058,1499247	195	270	154	0.159	0.034	-7.666	NaN	NaN	NaN	None
K37_0106	Canterbury	5139785,1479156	10	270	181	0.095	0.021	-5.29	NaN	NaN	NaN	None
K37_0126	Canterbury	5124514,1465749	48	229	202	0.075	0.016	-4.205	NaN	NaN	NaN	None
K37_0215	Canterbury	5144112,1487848	26	270	172	0.12	0.026	-6.077	133	45	315	Increase
K37_0278	Canterbury	5147868,1473575	16	270	179	0.091	0.023	-4.966	NaN	NaN	NaN	None
K37_1792	Canterbury	5126830,1494635	6	270	182	0.121	0.023	-6.057	NaN	NaN	NaN	None
K37_2416	Canterbury	5126040,1485138	138	270	188	0.107	0.021	-5.396	NaN	NaN	NaN	None
K37_2417	Canterbury	5125932,1484978	76	270	188	0.107	0.021	-5.383	-157	-157	30	Decrease
K37_2456	Canterbury	5125982,1485055	17	270	188	0.107	0.021	-5.39	107	0	750	No change
K37_2896	Canterbury	5125976,1460116	9	260	205	0.065	0.014	-3.915	NaN	NaN	NaN	None
K37_2923	Canterbury	5120270,1461189	9	270	208	0.071	0.015	-3.916	10	10	15	Increase
K37_2934	Canterbury	5148086,1471472	146	270	181	0.09	0.022	-4.805	82	92	45	Increase
K38_0013	Canterbury	5107714,1472201	79	270	210	0.091	0.018	-4.259	-44	-23	30	Decrease
K38_0060	Canterbury	5102409,1465412	9	270	219	0.082	0.017	-3.863	NaN	NaN	NaN	None
K38_1081	Canterbury	5108598,1471398	13	270	210	0.089	0.018	-4.239	-8	0	30	No change
K38_1571	Canterbury	5113600,1483539	5	270	199	0.106	0.021	-4.964	NaN	NaN	NaN	None
K38_1705	Canterbury	5105700,1479436	100	97	208	0.1	0.02	-4.555	NaN	NaN	NaN	None
K38_1706	Canterbury	5105700,1479436	73	97	208	0.1	0.02	-4.555	NaN	NaN	NaN	None
K38_1707	Canterbury	5105700,1479436	34	97	208	0.1	0.02	-4.555	NaN	NaN	NaN	None
K38_1758	Canterbury	5105417,1466498	14	220	216	0.083	0.017	-3.96	NaN	NaN	NaN	None
K38_1821	Canterbury	5105701,1479435	19	97	208	0.1	0.02	-4.555	NaN	NaN	NaN	None
K38_2111	Canterbury	5110390,1473751	9	223	207	0.093	0.019	-4.387	NaN	NaN	NaN	None
K38_2154	Canterbury	5112620,1461778	8	214	213	0.076	0.015	-3.854	-7	0	30	No change
K38_2155	Canterbury	5110315,1463944	8	270	214	0.079	0.016	-3.922	-9	-4	60	Decrease
K38_2157	Canterbury	5112326,1464498	5	247	212	0.078	0.016	-3.976	NaN	NaN	NaN	None
K38_2428	Canterbury	5118068,1469301	97	270	204	0.083	0.017	-4.303	NaN	NaN	NaN	None
K38_2429	Canterbury	5118043,1469264	19	270	204	0.083	0.017	-4.301	NaN	NaN	NaN	None
L35_0154	Canterbury	5182586,1518520	30	225	123	0.185	0.034	-11.904	NaN	NaN	NaN	None
L35_0604	Canterbury	5180964,1517005	21	270	125	0.175	0.033	-11.48	NaN	NaN	NaN	None
L36_0064	Canterbury	5175888,1525601	89	270	124	0.185	0.035	-12.805	49	-96	780	Decrease
L36_0282	Canterbury	5154964,1527579	40	219	140	0.115	0.03	-10.956	128	46	30	Increase
L36_0292	Canterbury	5153988,1527460	16	269	141	0.117	0.03	-10.843	-6	6	45	Increase
L36_0632	Canterbury	5151997,1525007	15	225	144	0.122	0.03	-10.351	9	0	45	No change
L36_0633	Canterbury	5151760,1524722	46	225	144	0.124	0.03	-10.295	94	40	60	Increase
L36_1157	Canterbury	5167541,1515688	100	270	137	0.143	0.033	-10.342	10	0	60	No change
L36_1191	Canterbury	5148438,1512973	205	270	153	0.137	0.029	-8.702	1	-4	30	Decrease
L36_1226	Canterbury	5174593,1513845	109	270	132	0.148	0.033	-10.488	-26	0	30	No change
L36_1340	Canterbury	5148438,1512973	85	270	153	0.137	0.029	-8.702	-35	-35	30	Decrease
L36_2175	Canterbury	5167030,1537887	18	236	124	0.264	0.04	-13.949	133	8	30	Increase
L36/2210	Canterbury	5167541,1515688	254	270	137	0.143	0.033	-10.342	44	899	5265	Increase
L36_2254	Canterbury	5159313,1536084	139	264	132	0.175	0.035	-12.596	76	59	45	Increase
L36_2255	Canterbury	5159313,1536084	119	264	132	0.175	0.035	-12.596	58	55	45	Increase
L36_2267	Canterbury	5167541,1515688	160	270	137	0.143	0.033	-10.342	131	68	60	Increase
L36_2369	Canterbury	5157684,1536138	21	210	133	0.159	0.034	-12.391	-8	-7	30	Decrease
L37_0022	Canterbury	5136986,1519495	63	270	159	0.146	0.027	-8.551	99	0	30	No change
L37_0024	Canterbury	5145481,1516114	70	270	154	0.135	0.029	-8.836	-10	0	30	No change
L37_0451	Canterbury	5145654,1536546	9	210	144	0.156	0.03	-10.974	NaN	NaN	NaN	None
L37_0693	Canterbury	5131686,1520654	80	90	163	0.147	0.025	-8.264	NaN	NaN	NaN	None
L37_0867	Canterbury	5131685,1520654	30	90	163	0.147	0.025	-8.264	NaN	NaN	NaN	None
L37_1713	Canterbury	5131692,1520668	151	90	163	0.148	0.025	-8.265	38	38	15	Increase
M33_0280	Canterbury	5256830,1572320	8	245	34	2.985	0.239	-112.095	10	10	15	Increase
M34_0278	Canterbury	5211390,1558603	6	280	76	0.68	0.088	-33.148	NaN	NaN	NaN	None
M34_0295	Canterbury	5213044,1551691	6	270	79	0.722	0.086	-29.625	NaN	NaN	NaN	None
M34_0497	Canterbury	5220625,1578006	5	270	58	0.996	0.163	-53.363	66	66	30	Increase
M35_0058	Canterbury	5199244,1547726	11	270	92	0.432	0.062	-23.155	-6	-6	30	Decrease
M35_0366	Canterbury	5205962,1568873	15	234	75	0.69	0.083	-35.188	5	5	60	Increase
M35_0846	Canterbury	5196358,1572012	88	210	83	0.91	0.078	-30.436	NaN	NaN	NaN	None
M35_0931	Canterbury	5185254,1549904	29	210	102	0.341	0.053	-20.06	66	-13	195	Decrease
M35_1079	Canterbury	5180266,1558346	29	210	103	0.303	0.055	-20.653	-5	11	45	Increase
M35_1080	Canterbury	5181898,1555315	30	210	103	0.328	0.054	-20.47	7	-7	75	Decrease
M35_1163	Canterbury	5193223,1572446	70	210	86	0.779	0.079	-28.873	65	53	45	Increase
M35_11913	Canterbury	5195088,1557549	18	270	90	0.343	0.058	-25.421	NaN	NaN	NaN	None
M35_1380	Canterbury	5184870,1569383	22	190	94	0.61	0.089	-24.453	44	44	15	Increase
M35_1384	Canterbury	5178975,1570902	122	210	100	0.662	0.08	-22.464	156	0	30	No change
M35_1878	Canterbury	5178921,1562668	34	210	102	0.357	0.066	-21.087	15	4	60	Increase
M35_2081	Canterbury	5179317,1572313	126	210	99	0.626	0.08	-22.787	128	0	45	No change
M35_2679	Canterbury	5206241,1561523	9	245	78	0.516	0.073	-32.018	NaN	NaN	NaN	None
M35_3779	Canterbury	5181981,1571702	83	194	96	0.632	0.088	-23.707	-423	36	60	Increase
M35_4873	Canterbury	5192730,1556402	26	270	93	0.342	0.057	-24.187	42	11	270	Increase
M35_5157	Canterbury	5180992,1568418	100	210	98	0.627	0.088	-22.804	184	56	45	Increase
M35_5560	Canterbury	5180988,1565793	21	210	99	0.507	0.079	-22.342	-12	0	45	No change
M35_5760	Canterbury	5178671,1575608	68	176	98	0.486	0.065	-22.962	354	318	75	Increase
M35_6107	Canterbury	5178661,1575619	39	176	98	0.486	0.065	-22.96	249	60	105	Increase
M35_7753	Canterbury	5180878,1578799	55	140	96	0.434	0.08	-24.178	289	289	15	Increase
M35_7896	Canterbury	5180878,1578799	6	140	96	0.434	0.08	-24.178	-5	0	45	No change
M35_8370	Canterbury	5188665,1561242	6	220	94	0.347	0.058	-24.106	0	-53	2610	Decrease
M35_8371	Canterbury	5188776,1560799	6	220	94	0.347	0.056	-24.032	0	-93	2760	Decrease
M35_8372	Canterbury	5185789,1542031	30	210	106	0.328	0.05	-18.084	6	0	30	No change
M35_8373	Canterbury	5185856,1541625	30	210	106	0.328	0.05	-17.988	NaN	NaN	NaN	None
M35_8379	Canterbury	5187099,1541640	7	223	105	0.333	0.05	-18.239	NaN	NaN	NaN	None
M35_8380	Canterbury	5187216,1541132	9	209	105	0.333	0.049	-18.12	0	-13	340	Decrease
M35_8967	Canterbury	5187411,1541617	9	250	105	0.333	0.05	-18.295	5	-7	1110	Decrease
M35_8968	Canterbury	5189239,1559503	8	222	94	0.333	0.057	-23.855	-11	0	45	No change
M35_8969	Canterbury	5189854,1562371	8	216	93	0.368	0.059	-24.853	-6	0	30	No change
M35_9850	Canterbury	5194566,1545081	36	270	97	0.387	0.057	-20.953	-116	-275	720	Decrease
M36_0183	Canterbury	5171612,1554097	30	210	113	0.403	0.047	-17.58	NaN	NaN	NaN	None
M36_0424	Canterbury	5156301,1544428	13	210	131	0.209	0.033	-13.271	NaN	NaN	NaN	None
M36_0932	Canterbury	5178188,1572511	154	210	100	0.596	0.069	-22.402	114	114	15	Increase
M36_10577	Canterbury	5150024,1543561	92	210	137	0.177	0.031	-12.258	-49	36	30	Increase
M36_10578	Canterbury	5150024,1543561	50	210	137	0.177	0.031	-12.258	-14	0	30	No change
M36_1160	Canterbury	5175996,1575447	31	276	101	0.409	0.035	-21.965	92	75	45	Increase
M36_2775	Canterbury	5156635,1562463	32	210	123	0.359	0.026	-15.345	-10	-10	30	Decrease
M36_4018	Canterbury	5176028,1563442	30	210	105	0.381	0.053	-20.33	-22	-22	30	Decrease
M36_4633	Canterbury	5158224,1548317	24	221	127	0.254	0.032	-14.068	64	64	15	Increase
M36_4674	Canterbury	5158226,1548317	9	221	127	0.254	0.032	-14.068	10	0	30	No change
M36_4740	Canterbury	5176504,1567243	27	210	103	0.417	0.053	-21.079	57	4	135	Increase
M36_4741	Canterbury	5176504,1567243	12	210	103	0.417	0.053	-21.079	34	8	120	Increase
M36_4783	Canterbury	5171697,1563558	22	210	109	0.475	0.042	-19.093	26	-33	885	Decrease
M36_4804	Canterbury	5167985,1555944	12	210	115	0.407	0.038	-17.038	NaN	NaN	NaN	None
M36_4886	Canterbury	5171697,1563558	9	210	109	0.475	0.042	-19.093	16	0	75	No change
M36_5325	Canterbury	5177457,1575998	33	136	100	0.446	0.039	-22.552	80	80	15	Increase
M36_5385	Canterbury	5177457,1575998	6	136	100	0.446	0.039	-22.552	156	156	15	Increase
M36_5893	Canterbury	5178296,1579642	54	67	98	0.361	0.052	-23.225	811	811	30	Increase
M36_5894	Canterbury	5178280,1579648	85	67	98	0.361	0.052	-23.219	225	115	30	Increase
M36_5895	Canterbury	5178265,1579654	138	67	98	0.361	0.052	-23.214	62	62	15	Increase
M36_7535	Canterbury	5177731,1575544	21	136	99	0.465	0.049	-22.604	116	41	330	Increase
M36_8515	Canterbury	5150024,1543561	140	210	137	0.177	0.031	-12.258	57	48	45	Increase
M37_0287	Canterbury	5146369,1563403	62	237	133	0.231	0.026	-13.463	38	0	45	No change
M37_0461	Canterbury	5143777,1546043	16	217	141	0.181	0.027	-11.654	-15	-15	30	Decrease
M37_0463	Canterbury	5143774,1546049	84	217	141	0.181	0.027	-11.655	41	0	30	No change
N34_0060	Canterbury	5233908,1580838	34	270	45	1.564	0.159	-78.841	51	22	105	Increase
N34_0110	Canterbury	5236721,1588204	48	425	39	1.608	0.146	-93.194	398	361	150	Increase
O31_0026	Canterbury	5307358,1651206	6	210	60	3.657	0.512	-807.624	228	-106	90	Decrease
O31_0200	Canterbury	5309182,1653878	17	265	63	3.458	0.488	-999.819	1368	169	11160	Increase
BQ32/0022	Wellington	5438703,1762818	20	224	231	1.847	0.183	-50.06	18	14	105	Increase
BQ32/0023	Wellington	5439997,1763928	20	489	232	1.312	0.178	-47.949	-53	-11	45	Decrease
BQ32/0028	Wellington	5439997,1763929	12	489	232	1.312	0.178	-47.948	18	0	30	No change
BQ32/0029	Wellington	5439997,1763927	7	489	232	1.312	0.178	-47.951	-11	-11	15	Decrease
BQ32/0030	Wellington	5438703,1762819	13	224	231	1.847	0.183	-50.058	18	9	30	Increase
BQ32/0031	Wellington	5438703,1762817	7	224	231	1.847	0.183	-50.062	6	6	15	Increase
R25/0003	Wellington	5482692,1776328	61	151	272	1.225	0.168	-26.834	25	25	15	Increase
R25/5262	Wellington	5479412,1775470	98	210	269	1.206	0.154	-28.078	49	307	4380	Increase
R25/7086	Wellington	5479894,1775295	4	215	270	1.238	0.169	-28.074	15	13	135	Increase
R25/7087	Wellington	5479298,1774698	4	76	269	1.206	0.169	-28.581	35	3	225	Increase
R26/6284	Wellington	5473167,1772736	90	211	263	1.165	0.16	-31.403	93	359	3600	Increase
R26/6287	Wellington	5474307,1770587	6	97	262	1.427	0.179	-32.683	NaN	NaN	NaN	None
R26/6566	Wellington	5473310,1769407	79	112	261	1.471	0.18	-33.874	120	120	15	Increase
R26/6594	Wellington	5473136,1770722	74	190	262	1.312	0.18	-32.918	59	0	30	No change
R26/6831	Wellington	5469188,1768770	10	210	257	1.323	0.189	-35.666	-94	-79	195	Decrease
R26/6833	Wellington	5471508,1766872	9	200	258	1.554	0.182	-36.509	NaN	NaN	NaN	None
R26/6879	Wellington	5479424,1775707	5	210	270	1.132	0.154	-27.93	1	-53	165	Decrease
R26/6886	Wellington	5474425,1771939	6	210	263	1.267	0.176	-31.661	NaN	NaN	NaN	None
R26/6916	Wellington	5473136,1770722	21	190	262	1.312	0.18	-32.918	56	115	180	Increase
R26/6956	Wellington	5473310,1769407	79	112	261	1.471	0.18	-33.874	23	0	75	No change
R26/6991	Wellington	5474443,1773517	5	216	264	1.193	0.168	-30.528	-21	-6	90	Decrease
R26/7025	Wellington	5473628,1772141	5	211	263	1.233	0.176	-31.724	NaN	NaN	NaN	None
R27/0120	Wellington	5434956,1758778	30	210	225	1.937	0.248	-59.021	819	819	75	Increase
R27/0122	Wellington	5433546,1758748	26	75	224	2.107	0.281	-58.96	44	44	15	Increase
R27/0320	Wellington	5434508,1756996	115	175	224	1.419	0.183	-63.704	203	203	10	Increase
R27/1086	Wellington	5433246,1759813	181	228	225	2.129	0.321	-56.156	142	142	15	Increase
R27/1115	Wellington	5435716,1759588	24	210	226	1.937	0.257	-57.055	1111	1111	90	Increase
R27/1116	Wellington	5436816,1761599	52	212	229	1.641	0.2	-52.487	-226	-133	105	Decrease
R27/1117	Wellington	5438391,1763574	14	224	231	1.847	0.276	-48.504	6	0	150	No change
R27/1122	Wellington	5434602,1759757	24	210	226	2.069	0.27	-56.535	815	815	195	Increase
R27/1171	Wellington	5431227,1756493	23	185	221	1.32	0.169	-64.947	168	0	75	No change
R27/1265	Wellington	5434516,1756998	48	175	224	1.419	0.183	-63.698	325	325	15	Increase
R27/6386	Wellington	5435971,1759039	115	402	226	1.66	0.257	-58.405	168	158	45	Increase
R27/7004	Wellington	5444445,1770649	32	262	240	1.166	0.193	-37.248	NaN	NaN	NaN	None
R27/7153	Wellington	5433523,1758681	34	75	224	2.107	0.281	-59.133	478	478	15	Increase
R27/7154	Wellington	5434294,1757020	45	175	224	1.419	0.183	-63.643	364	364	15	Increase
R27/7215	Wellington	5434298,1757022	57	175	224	1.419	0.183	-63.638	307	307	15	Increase
S25/5208	Wellington	5480785,1780182	192	287	273	0.869	0.104	-25.056	85	397	113820	Increase
S25/5332	Wellington	5487286,1782183	9	247	280	0.962	0.121	-22.927	5	-5	30	Decrease
S26/0033	Wellington	5464562,1818493	12	222	289	0.715	0.114	-7.982	NaN	NaN	NaN	None
S26/0738	Wellington	5453577,1815311	5	270	279	1.246	0.089	-6.833	-98	-98	15	Decrease
S26/0743	Wellington	5451785,1815028	33	519	278	1.329	0.087	-6.481	-127	-29	405	Decrease
S26/1032	Wellington	5449868,1813337	18	270	275	1.421	0.078	-6.528	-68	342	4890	Increase
S26/1033	Wellington	5449868,1813337	8	270	275	1.421	0.078	-6.528	-40	-40	60	Decrease
S26/1034	Wellington	5453628,1811188	21	270	276	1.315	0.08	-8.261	-162	-162	15	Decrease
S26/1035	Wellington	5453628,1811188	7	270	276	1.315	0.08	-8.261	-6	0	75	No change
S26/1053	Wellington	5452481,1814051	10	270	278	1.313	0.084	-6.978	-77	-35	210	Decrease
S27/0099	Wellington	5442510,1803170	17	270	263	1.396	0.085	-8.153	-195	-355	3270	Decrease
S27/0202	Wellington	5446520,1805461	5	270	267	1.481	0.073	-8.553	-11	-10	45	Decrease
S27/0225	Wellington	5447719,1807071	4	224	269	1.528	0.073	-8.249	-25	-25	15	Decrease
S27/0309	Wellington	5436461,1797877	28	426	255	1.037	0.096	-8.114	-32	77	1920	Increase
S27/0317	Wellington	5437083,1797799	18	226	255	1.075	0.097	-8.475	-156	512	5820	Increase
S27/0330	Wellington	5440421,1797767	20	210	257	1.16	0.097	-10.07	NaN	NaN	NaN	None
S27/0346	Wellington	5437102,1804059	10	212	260	1.219	0.094	-5.417	-51	-51	45	Decrease
S27/0381	Wellington	5435941,1805651	21	165	261	1.166	0.099	-4.203	-31	-19	60	Decrease
S27/0428	Wellington	5430809,1787618	44	191	244	0.998	0.108	-11.519	399	271	405	Increase
S27/0434	Wellington	5428337,1786852	45	151	241	1	0.109	-10.24	449	270	480	Increase
S27/0481	Wellington	5431317,1799718	23	210	253	0.877	0.087	-4.26	-381	-381	690	Decrease
S27/0522	Wellington	5431324,1803032	21	210	256	0.887	0.086	-2.806	NaN	NaN	NaN	None
S27/0571	Wellington	5433014,1807158	32	270	260	1.036	0.085	-2.173	NaN	NaN	NaN	None
S27/0587	Wellington	5423379,1781042	34	220	234	1.217	0.134	-10.857	-327	112	5310	Increase
S27/0878	Wellington	5447916,1811470	25	214	273	1.542	0.074	-6.613	-96	-74	30	Decrease
S27/0881	Wellington	5447952,1811660	9	214	273	1.53	0.074	-6.556	NaN	NaN	NaN	None
S27/0883	Wellington	5447188,1810184	14	168	271	1.596	0.073	-6.859	-11	-5	75	Decrease
S27/0884	Wellington	5441241,1808478	8	169	266	1.767	0.062	-5.416	NaN	NaN	NaN	None
S27/0885	Wellington	5445646,1808967	10	63	269	1.676	0.07	-6.823	-10	-10	15	Decrease
T26/0494	Wellington	5462681,1828039	23	210	295	0.527	0.121	-5.232	-49	-18	165	Decrease
T26/0501	Wellington	5462612,1826098	5	210	293	0.526	0.137	-5.666	NaN	NaN	NaN	None
T26/0814	Wellington	5460584,1826428	10	210	292	0.574	0.127	-5.238	NaN	NaN	NaN	None
O28w/0220	Marlborough	5397740,1641544	12	212	130	2.997	0.118	42.136	NaN	NaN	NaN	None
P28w/0949	Marlborough	5403000,1678487	69	164	150	3.536	0.259	-741.869	370	0	750	No change
10109	Marlborough	5412965,1674992	11	796	157	3.572	0.145	-441.549	7	7	90	Increase
10485	Marlborough	5406847,1666584	15	181	148	3.387	0.147	-397.343	23	10	75	Increase
P28w/1323	Marlborough	5401418,1670584	56	471	145	3.781	0.165	-585.199	2084	156	6690	Increase
P28w/1873	Marlborough	5399251,1667661	93	307	142	3.863	0.149	-550.706	1689	313	1170	Increase
P28w/2917	Marlborough	5399336,1667470	405	307	142	3.843	0.149	-543.752	4784	1324	173460	Increase
P28w/3009	Marlborough	5408625,1675125	6	210	154	3.566	0.182	-527.409	20	15	75	Increase
P28w/3010	Marlborough	5404493,1673268	13	226	149	3.66	0.174	-581.159	NaN	NaN	NaN	None
P28w/3069	Marlborough	5401066,1665829	6	243	143	3.712	0.141	-469.67	5	5	60	Increase
P28w/3291	Marlborough	5401916,1675355	168	271	148	3.728	0.206	-695.841	5389	3098	164340	Increase
P28w/3667	Marlborough	5412686,1686069	40	50	163	5.282	0.176	-592.975	582	582	585	Increase
P28w/3668	Marlborough	5412684,1686068	8	50	163	5.282	0.176	-593.015	26	13	60	Increase
P28w/3711	Marlborough	5413489,1686252	10	77	163	5.228	0.176	-574.321	22	17	480	Increase
P28w/3821	Marlborough	5406330,1667691	22	212	148	3.49	0.152	-427.193	123	8	240	Increase
P28w/3954	Marlborough	5405365,1677787	12	148	152	3.49	0.214	-657.684	36	4	990	Increase
P28w/4404	Marlborough	5407267,1678588	15	164	154	3.616	0.205	-623.02	362	25	810	Increase
7429013	Auckland	5879122,1766122	108	1000	627	0.08	0.024	-0.941	11	0	60	No change
7419119	Auckland	5892825,1767897	207	556	641	0.045	0.014	-0.871	-201	-229	165	Decrease
6498003	Auckland	5911693,1760812	25	273	658	0.028	0.012	-0.782	-27	-27	45	Decrease
6437021	Auckland	5976893,1756222	50	384	720	0.016	0.005	-0.555	-123	-15	120	Decrease
6457041	Auckland	5954106,1752872	405	922	697	0.02	0.006	-0.62	201	749	2940	Increase
6457097	Auckland	5954106,1752872	52	922	697	0.02	0.006	-0.62	515	515	6525	Increase
OB1_WL	Auckland	5970552,1747851	76	559	712	0.017	0.006	-0.568	100	317	375	Increase
OB2_WL	Auckland	5970607,1747937	166	559	712	0.017	0.006	-0.568	297	414	360	Increase
OB3A_WL	Auckland	5970660,1748910	30	584	712	0.017	0.006	-0.568	-39	-56	330	Decrease
OB3B_WL	Auckland	5970639,1748909	122	584	712	0.017	0.006	-0.568	-25	-16	105	Decrease
OB4A_WL	Auckland	5970104,1747541	30	559	712	0.017	0.006	-0.569	112	367	360	Increase
OB4B_WL	Auckland	5970104,1747541	120	559	712	0.017	0.006	-0.569	-191	290	2880	Increase
OB5_WL	Auckland	5970487,1746940	120	924	712	0.017	0.006	-0.568	-100	-100	780	Decrease
OB6_WL	Auckland	5971190,1747990	130	998	713	0.017	0.006	-0.566	66	281	360	Increase
OB7_WL	Auckland	5969587,1747220	7	699	711	0.017	0.006	-0.57	NaN	NaN	NaN	None
SRPW1_WL	Auckland	5970551,1747899	198	559	712	0.017	0.006	-0.568	241	521	360	Increase
1003	Hawkes Bay	5604379,1921894	10	210	460	0.558	0.126	-1.95	2	0	45	No change
3702	Hawkes Bay	5573215,1887644	124	250	414	0.226	0.065	-3.057	22	0	90	No change
3737	Hawkes Bay	5606560,1924432	29	210	464	0.581	0.141	-1.89	15	4	30	Increase
4702	Hawkes Bay	5563968,1892928	105	248	411	0.35	0.109	-2.816	NaN	NaN	NaN	None
10371	Hawkes Bay	5609662,1922530	13	210	465	0.626	0.135	-1.934	11	0	60	No change
15004	Hawkes Bay	5604657,1919629	25	458	459	0.548	0.123	-2.005	418	0	900	No change
GND0229	Taranaki	5615179,1711735	297	655	359	1.175	0.092	-7.603	-16	14	75	Increase
GND0447	Taranaki	5606411,1721529	1383	373	354	1.18	0.097	-8.513	NaN	NaN	NaN	None
GND0508	Taranaki	5669859,1694021	14	555	407	1.348	0.048	-4.044	NaN	NaN	NaN	None
GND0519	Taranaki	5669270,1696493	795	540	407	1.606	0.053	-4.101	NaN	NaN	NaN	None
GND0599	Taranaki	5631128,1712050	83	413	374	1.477	0.071	-6.343	-106	-18	840	Decrease
GND0600	Taranaki	5631130,1712046	20	413	374	1.477	0.071	-6.343	NaN	NaN	NaN	None
GND0708	Taranaki	5616538,1706711	94	316	359	1.139	0.094	-7.413	-75	111	120	Increase
GND1015	Taranaki	5644294,1711951	8	425	387	1.043	0.057	-5.501	NaN	NaN	NaN	None
GND2000	Taranaki	5664955,1694677	464	555	402	1.421	0.053	-4.253	NaN	NaN	NaN	None
GND2288	Taranaki	5621624,1684925	7	85	358	0.866	0.099	-6.473	NaN	NaN	NaN	None
GND2317	Taranaki	5602658,1720841	13	286	350	1.182	0.102	-8.905	-20	34	585	Increase
GND0213	Taranaki	5682097,1711187	22	270	423	2.632	0.06	-3.769	27	16	120	Increase
64_829	Waikato	5820272,1841688	226	210	597	0.131	0.035	-1.235	NaN	NaN	NaN	None
64_830	Waikato	5820312,1841738	40	210	597	0.131	0.035	-1.235	NaN	NaN	NaN	None
1345_1	Waikato	5820327,1841753	8	210	597	0.131	0.035	-1.235	-106	-42	1560	Decrease
G40/0367	Otago	5047533,1305563	17	292	373	0.115	0.033	-0.601	3	0	15	No change
J41/0178	Otago	4998927,1434917	8	1000	321	0.052	0.018	-1.857	NaN	NaN	NaN	None
G42/0695	Otago	4987516,1312984	18	236	406	0.065	0.017	-0.724	NaN	NaN	NaN	None
I44/0005	Otago	4914365,1405335	6	828	409	0.062	0.009	-1.083	NaN	NaN	NaN	None
G43/0209	Otago	4940402,1316600	23	261	438	0.036	0.01	-0.709	5	0	45	No change
G43/0072	Otago	4954944,1310456	17	287	432	0.045	0.012	-0.694	NaN	NaN	NaN	None
G46/0152	Otago	4986341,1321034	10	257	402	0.063	0.017	-0.775	-2	0	35	No change
Otago_8	Otago	4906010,1380325	NaN	210	429	0.03	0.008	-0.931	NaN	NaN	NaN	None
DL652A	Contact Energy	5002558,1302715	97	947	404	0.076	0.02	-0.656	NaN	NaN	NaN	None
DL756A	Contact Energy	5002272,1302826	90	947	404	0.076	0.02	-0.657	-228	-228	480	Decrease
DL670A	Contact Energy	5001881,1303098	98	731	404	0.076	0.02	-0.659	-149	0	5340	No change
DL545A	Contact Energy	5000959,1307068	271	966	401	0.075	0.02	-0.684	6691	3032	223500	Increase
DL545B	Contact Energy	5000959,1307068	178	966	401	0.075	0.02	-0.684	NaN	NaN	NaN	None
DL1330A	Contact Energy	5000548,1307089	52	966	402	0.074	0.02	-0.685	-280	-280	25140	Decrease
DL1331A	Contact Energy	4998956,1308941	70	1037	401	0.073	0.02	-0.697	160	160	14880	Increase
DL790A	Contact Energy	4996283,1309605	7	1008	403	0.071	0.019	-0.702	NaN	NaN	NaN	None
DL1202A	Contact Energy	4990581,1309395	20	247	407	0.067	0.018	-0.702	966	150	19200	Increase
DL1203A	Contact Energy	4990582,1309397	20	247	407	0.067	0.018	-0.702	-2842	-3322	27420	Decrease
DL1204A	Contact Energy	4990700,1309333	24	968	407	0.067	0.018	-0.702	-138	231	4260	Increase
DL1205A	Contact Energy	4990698,1309330	20	968	407	0.067	0.018	-0.702	-861	-1271	24600	Decrease
DL1206A	Contact Energy	4990782,1309288	21	968	407	0.067	0.018	-0.701	-1378	-1378	1560	Decrease
DFDP1B_P1	VUW	5200621,1383222	140	241	230	0.059	0.008	0.703	-1252	28	139.03	Increase
DFDP1B_P2	VUW	5200621,1383222	140	241	230	0.059	0.008	0.703	1578	-318	139.35	Decrease
