# Supplementary material for: Seismological and Hydrogeological Controls on New Zealand-Wide Groundwater Level Changes Induced by the 2016 Mw7.8 Kaikōura Earthquake
Source: Hindawi journal article supplement (doi:10.1155/2019/9809458), 2019-06-27
Supplement: f1 [file 9809458.f1.zip › Supplementary_Material_accepted_Weaver_et_al.pdf]

## Geofluids – Supplementary Figures

### Seismological and hydrogeological controls on New Zealand-wide groundwater level changes induced by the 2016 $M_w$ 7.8 Kaikōura earthquake

K.C. Weaver, S. C. Cox, J. Townend, H. Rutter, I. J. Hamling, and C. Holden

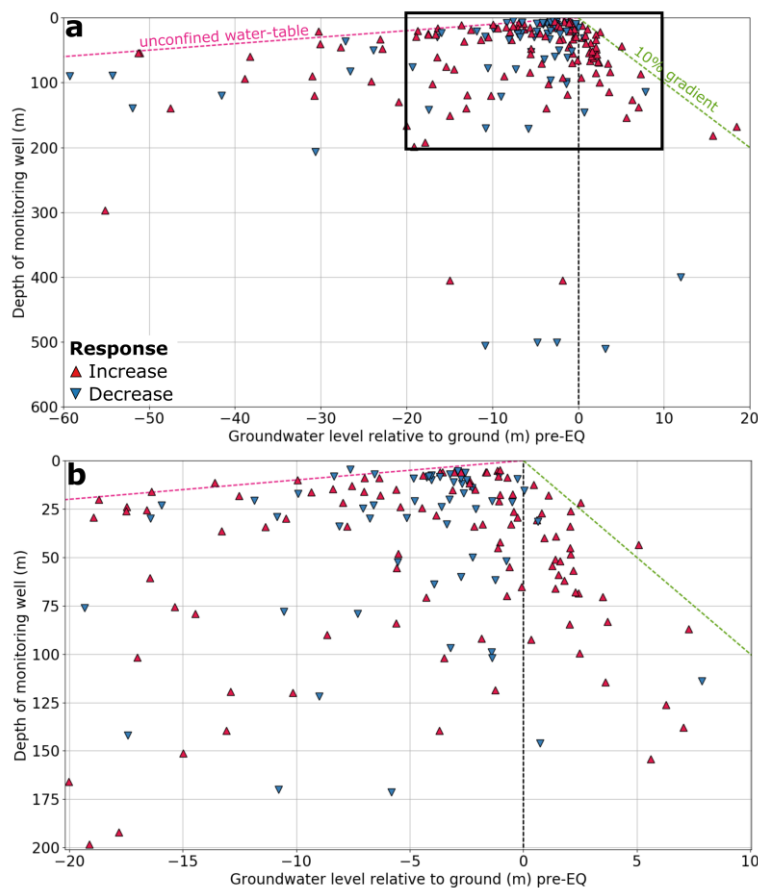

Figure S1 – Groundwater level relative to ground against depth of monitoring well. Flowing artesian wells have positive responses in 33 out of 39 incidences.
